# Supplementary material for: Segregation distortion: Utilizing simulated genotyping data to evaluate statistical methods
Source: PLOS journal article supplement (doi:10.1371/journal.pone.0228951), 2020-02-19

**S4 Fig. Comparison of the effect of selection position on formation of segregation distortion regions (SDRs).** Selection position 100 is in a region of low recombination, whereas position 200 is a region of high recombination. (a) shows the total number of SDR among 1000 simulations as a function of selection strength, whereas (b) shows the number of simulations with at least 1 SDR. Shown in the panel titles are the thresholds / type of statistical tests used to detect segregation distortion. num. = number, sim. = simulations

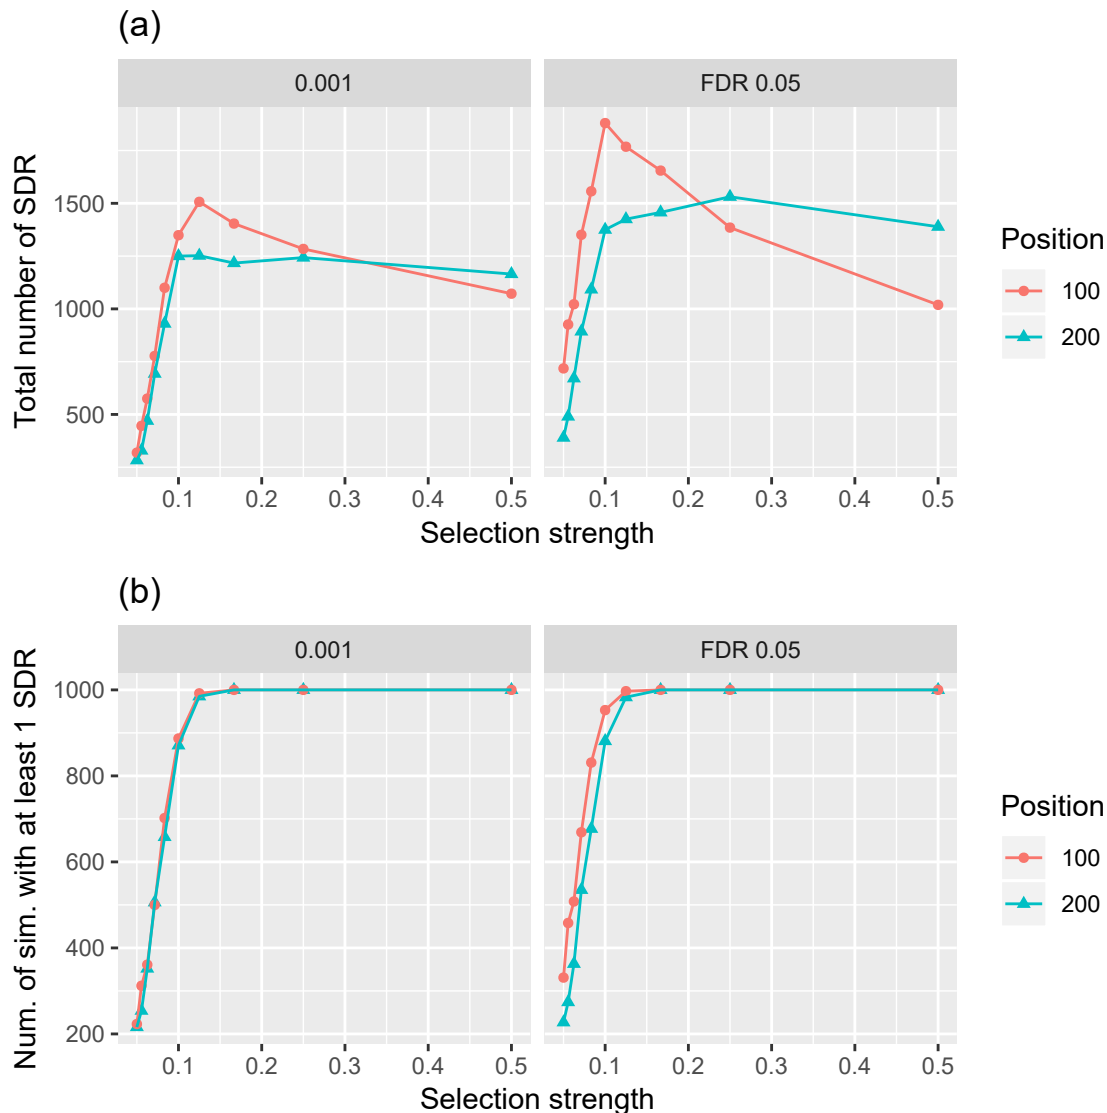

Supplement: S4 (10.1371/journal.pone.0228951.s004) [file journal.pone.0228951.s004]
